# Supplementary material for: Identification of dimethylamine monooxygenase in marine bacteria reveals a metabolic bottleneck in the methylated amine degradation pathway
Source: PubMed Central journal article supplement (PMC5520151; doi:10.1038/ismej.2017.31), 2017-03-17
Supplement: ismej201731x1.pdf [file ismej201731x1.pdf]

## Supplementary Figures

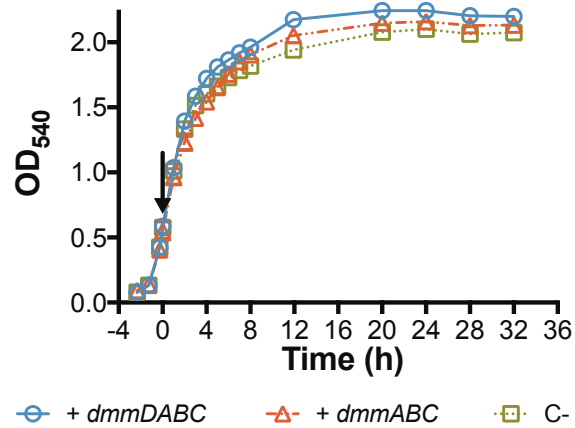

**Supplementary Figure S1.** Growth of transformed *E. coli* BLR(DE3)pLysS cells containing the *dmmDABC* genes, the structural genes *dmmABC*, or the expression vector pET28a as negative control (C-) in the presence of 1 mM DMA. The arrow indicates the time of IPTG addition (0.2 mM). Results presented are the mean of triplicates. Error bars denote standard deviation.

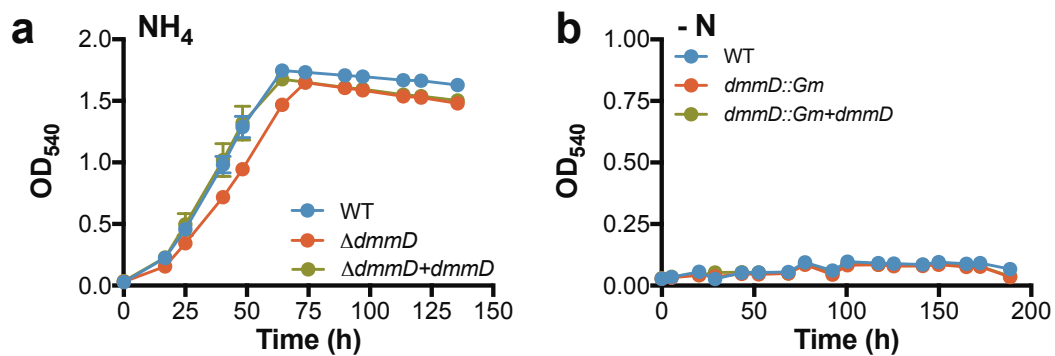

**Supplementary Figure S2.** Growth of *R. pomeroyi* DSS-3 wild-type (WT), *dmmD* mutant (*dmmD::Gm*), and its complementation with *dmmD* (*dmmD::Gm+dmmD*) on (a) ammonium as the sole nitrogen source or (b) without nitrogen source. Results presented are the mean of triplicates and error bars denote standard deviation.

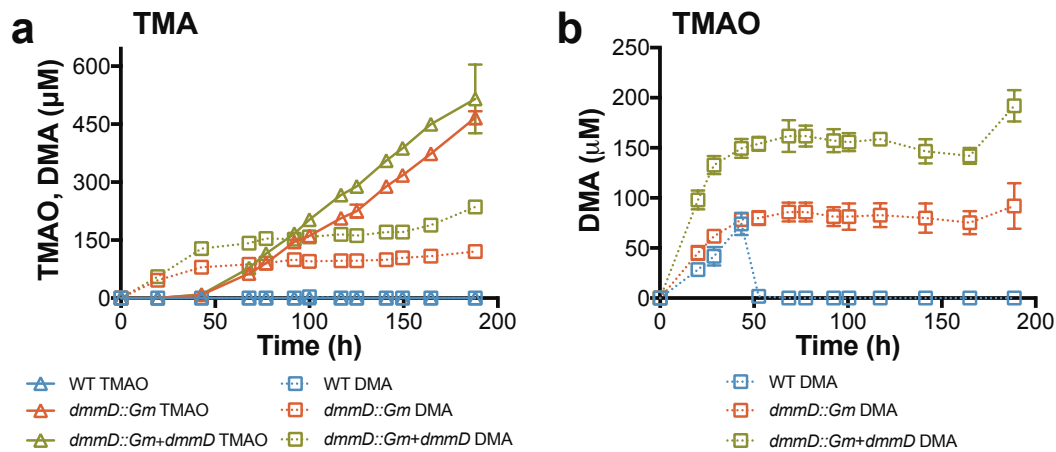

**Supplementary Figure S3.** Quantification of host and degradation products formed during the growth of *R. pomeroyi* DSS-3 wild-type (WT), *dmmD* disrupted mutant (*dmmD*::*Gm*), and its complementation with *dmmD* (*dmmD*::*Gm*+*dmmD*) on (a) TMA, and (b) TMAO. Results presented are the mean of triplicates and error bars denote standard deviation.

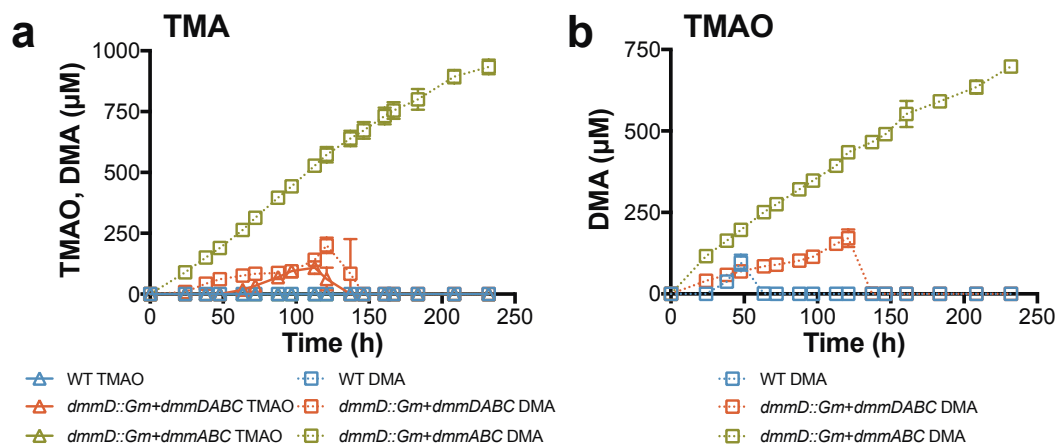

**Supplementary Figure S4.** Quantification of host and degradation products formed during growth of *R. pomeroyi* DSS-3 wild-type (WT), and the *dmmD* mutant (*dmmD*::*Gm*) complemented with the four-gene cluster *dmmDABC* (*dmmD*::*Gm*+*dmmDABC*) or the structural genes *dmmABC* (*dmmD*::*Gm*+*dmmABC*) plus promoter on (a) TMA, and (b) TMAO. Results presented are the mean of triplicates. Error bars denote standard deviation.

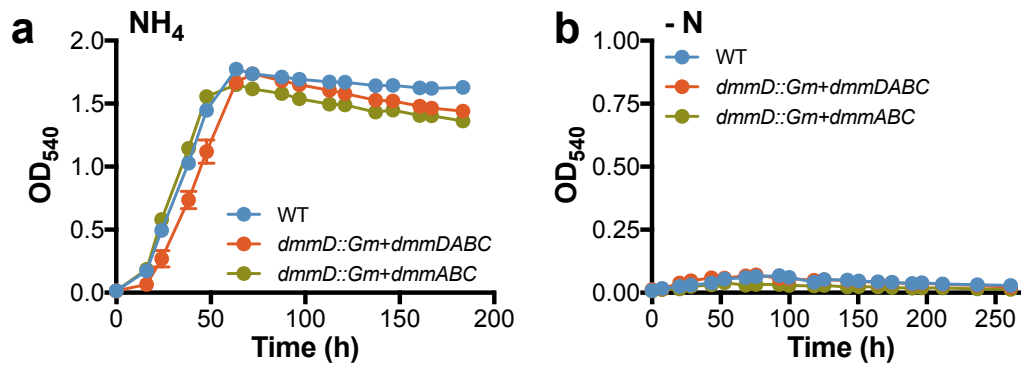

**Supplementary Figure S5.** Growth of *R. pomeroyi* DSS-3 wild-type (WT), and the *dmmD* mutant (*dmmD::Gm*) complemented with the four-gene cluster *dmmDABC* (*dmmD::Gm+dmmDABC*) or the structural genes *dmmABC* (*dmmD::Gm+dmmABC*) plus promoter on (a) ammonium as sole nitrogen source or (b) without nitrogen. Results presented are the mean of triplicates. Error bars denote standard deviation.

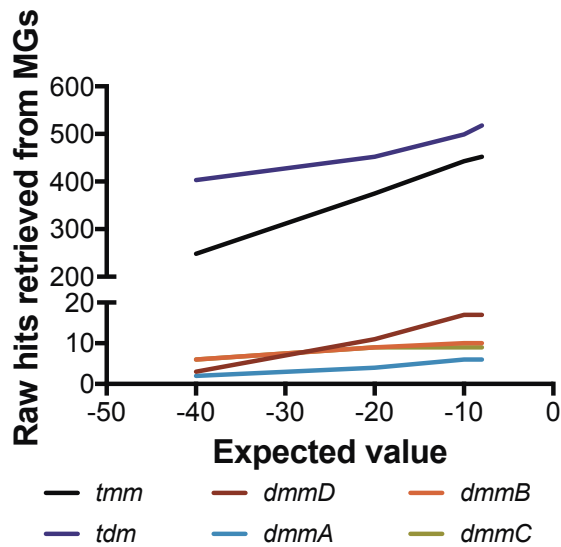

**Supplementary Figure S6.** Effect of stringency level on the retrieval of gene sequences from three large GOS metagenomes. Stringency thresholds applied were  $e^{-40}$ ,  $e^{-20}$ ,  $e^{-10}$ , and  $e^{-8}$ . Abbreviations as in Figure 1.
